# Supplementary material for: Post-COVID-19 Syndrome in Non-Hospitalized Individuals: Healthcare Situation 2 Years after SARS-CoV-2 Infection
Source: MDPI journal article supplement (doi:10.3390/v15061326), 2023-06-05
Supplement: s1 [file s1]

Supplementary Table S1: Frequency of symptoms experienced at baseline examination (median 9 months post diagnosis) and follow-up survey (median 26 months post diagnosis).

|                              | <b>Baseline<br/>(n = 304)</b> |          | <b>Follow-Up<br/>(n = 304)</b> |          |
|------------------------------|-------------------------------|----------|--------------------------------|----------|
|                              | <b>n</b>                      | <b>%</b> | <b>n</b>                       | <b>%</b> |
| Fatigue or exhaustion        | 103                           | 33.89    | 158                            | 52.8     |
| Concentration problems       | 82                            | 27.2     | 105                            | 34.9     |
| Sleep problems               | 80                            | 26.4     | 91                             | 30.4     |
| Headache                     | 76                            | 25.1     | 114                            | 37.6     |
| Dyspnea on exertion          | 74                            | 24.4     | 82                             | 27.4     |
| Memory problems              | 71                            | 23.4     | 101                            | 33.6     |
| Muscle – or joint pain       | 67                            | 22.1     | 127                            | 42.1     |
| Mood swings                  | 66                            | 21.8     | 80                             | 26.6     |
| Impairment of smell function | 62                            | 20.5     | 50                             | 16.5     |
| Sleepiness                   | 58                            | 19.1     | 93                             | 31.0     |
| Flatulence                   | 56                            | 18.5     | 94                             | 31.2     |
| Depressive mood              | 51                            | 16.8     | 61                             | 20.3     |
| Impairment of taste function | 50                            | 16.5     | 35                             | 11.6     |
| Heartburn                    | 48                            | 15.8     | 45                             | 15.1     |
| Rhinitis or running nose     | 46                            | 15.2     | 83                             | 27.4     |
| Palpitations                 | 45                            | 14.9     | 55                             | 18.5     |
| Stuffy nose                  | 42                            | 13.9     | 80                             | 26.4     |
| Cough                        | 34                            | 11.2     | 69                             | 23.1     |
| Throat pain                  | 32                            | 10.6     | 36                             | 12.1     |
| Hair loss                    | 30                            | 9.9      | 32                             | 10.6     |
| Teary eyes                   | 30                            | 9.9      | 50                             | 16.6     |
| Vertigo                      | 27                            | 8.9      | 47                             | 15.6     |
| Anxiety, panic               | 26                            | 8.6      | 36                             | 11.8     |
| Muscle weakness              | 25                            | 8.3      | 45                             | 15.0     |
| Muscle stiffness             | 24                            | 8.0      | 50                             | 16.6     |

|                                              |    |     |    |      |
|----------------------------------------------|----|-----|----|------|
| Dyspnea on rest-                             | 24 | 7.9 | 25 | 8.4  |
| Diarrhea                                     | 22 | 7.3 | 46 | 15.2 |
| Skin rash                                    | 21 | 6.9 | 22 | 7.3  |
| Stomach pain                                 | 19 | 6.3 | 31 | 10.3 |
| Feelings of pins and needles in arms or legs | 19 | 6.3 | 45 | 14.9 |
| Throat pain                                  | 17 | 5.6 | 67 | 22.1 |
| Impaired vision                              | 15 | 5.0 | 30 | 9.9  |
| Problems with coordination of movements      | 13 | 4.3 | 27 | 8.9  |
| Pink eyes or conjunctivitis                  | 12 | 4.0 | 15 | 5.0  |
| Nausea or vomiting                           | 10 | 3.3 | 13 | 4.4  |
| Swallowing pain                              | 9  | 3.0 | 41 | 13.6 |
| Loss of appetite                             | 8  | 2.6 | 19 | 6.3  |
| Shivering                                    | 5  | 1.7 | 12 | 4.0  |
| Increased temperature                        | 5  | 1.7 | 18 | 5.9  |
| Blue lips                                    | 4  | 1.3 | 4  | 1.3  |
| Fever (38.1 °C or higher)                    | 2  | 0.7 | 12 | 4.0  |
| Haemoptysis                                  | 0  | 0   | 0  | 0    |

---
